# Supplementary material
Source: publisher figshare collection journal article supplement (https://tandf.figshare.com/ndownloader/files/14861279)
Supplement: Supplementary file 1 [file 14861279]

**Supplementary Information**

**Supplementary Tables**

**Supplementary Table 1.** *СytB* gene sequences used for the phylogenetic analysis of the *Numenius* species

| Species name | Accession number |
| --- | --- |
| Slender-billed curlew – *N. tenuirostris* | MK108195 |
| Whimbrel – *N. phaeopus* *variegatus* | AF417930.1 |
| Whimbrel – *N. p. variegatus* | NC_030507.1 |
| Eurasian curlew – *N. arquata* | AF417929.1 |
| Far Eastern curlew – *N. madagascariensis* | AF417925.1 |
| Long-billed Bristle-thighed curlew – *N. tahitiensis* | KM218981.1 |
| Long-billed Bristle-thighed curlew – *N. tahitiensis* | JQ963054.1 |
| Long-billed curlew – *N. americanus* | JQ963052.1 |
| Upland sandpiper – *B. longicauda* | EF373122.1 |
| Pin-tailed snipe – *G. stenura* | NC_034741.1 |
| **Willet – *T. semipalmata*** | **NC_036016.1** |
| **Green sandpiper – *T. ochropus*** | **NC_033974.1** |
| **Spotted redshank – *T. erythropus*** | **NC_030585.1** |
| **Wood sandpiper *– T. glareola*** | **NC_039096.1** |
| **Terek sandpiper – *Xenus cinereus*** | **NC_033973.1** |
| **Spoon-billed sandpiper – *Calidris pygmaea*** | **NC_027496.1** |
| **Eurasian woodcock – *Scolopax rusticola*** | **NC_025521.1** |
| **Ruddy turnstone – *Arenaria interpres*** | **NC_003712.2** |
| **Bar-tailed godwit - *Limosa lapponica*** | **KX371106.1** |
| **Red-necked phalarope - *Phalaropus lobatus*** | **KY765409.1** |
| **Grey-headed lapwing – *Vanellus cinereus* (Charadriiformes: Charadriidae)** | **NC_025514.1** |
| **Northern lapwing – *Vanellus vanellus* (Charadriiformes: Charadriidae)** | **NC_025637.1** |

**Supplementary Table 2.** Mitogenomesequences (CDS) used for the phylogenetic analysis of the Scolopacidae species

| Species name | Accession number |
| --- | --- |
| Slender-billed curlew – *N. tenuirostris* | MK108195 |
| Whimbrel – *N. phaeopus variegatus* | NC_030507.1 |
| Willet – *T. semipalmata* | NC_036016.1 |
| Green sandpiper – *T. ochropus* | NC_033974.1 |
| Spotted redshank – *T. erythropus* | NC_030585.1 |
| Wood sandpiper *– T. glareola* | NC_039096.1 |
| Pin-tailed snipe – *G. stenura* | NC_034741.1 |
| Terek sandpiper – *Xenus cinereus* | NC_033973.1 |
| Spoon-billed sandpiper – *Calidris pygmaea* | NC_027496.1 |
| Eurasian woodcock – *Scolopax rusticola* | NC_025521.1 |
| Ruddy turnstone – *Arenaria interpres* | NC_003712.2 |
| **Bar-tailed godwit - *Limosa lapponica*** | **KX371106.1** |
| **Red-necked phalarope - *Phalaropus lobatus*** | **KY765409.1** |
| Grey-headed lapwing – *Vanellus cinereus* (Charadriiformes: Charadriidae) | NC_025514.1 |
| Northern lapwing – *Vanellus vanellus* (Charadriiformes: Charadriidae) | NC_025637.1 |

**Supplementary Table 3. Estimates of Evolutionary Divergence between Scolopacidae species. The number of base substitutions per site from between CDS sequences are shown. Analyses were conducted using the Maximum Composite Likelihood model**

| *Numenius_tenuirostris* |  |  |  |  |  |  |  |  |  |  |  |  |  |  |
| --- | --- | --- | --- | --- | --- | --- | --- | --- | --- | --- | --- | --- | --- | --- |
| *Numenius_phaeopus* | **0,106** |  |  |  |  |  |  |  |  |  |  |  |  |  |
| *Limosa_lapponica* | **0,173** | **0,171** |  |  |  |  |  |  |  |  |  |  |  |  |
| *Arenaria_interpres* | **0,166** | **0,168** | **0,156** |  |  |  |  |  |  |  |  |  |  |  |
| *Calidris_pygmaea* | **0,170** | **0,164** | **0,152** | **0,138** |  |  |  |  |  |  |  |  |  |  |
| *Tringa_ochropus* | **0,172** | **0,177** | **0,160** | **0,156** | **0,149** |  |  |  |  |  |  |  |  |  |
| *Tringa_glareola* | **0,171** | **0,169** | **0,155** | **0,149** | **0,143** | **0,128** |  |  |  |  |  |  |  |  |
| *Tringa_erythropus* | **0,172** | **0,166** | **0,152** | **0,145** | **0,139** | **0,128** | **0,110** |  |  |  |  |  |  |  |
| *Tringa_semipalmata* | **0,167** | **0,160** | **0,149** | **0,141** | **0,141** | **0,123** | **0,101** | **0,093** |  |  |  |  |  |  |
| *Xenus_cinereus* | **0,177** | **0,172** | **0,161** | **0,158** | **0,156** | **0,157** | **0,150** | **0,149** | **0,142** |  |  |  |  |  |
| *Phalaropus_lobatus* | **0,172** | **0,169** | **0,159** | **0,153** | **0,145** | **0,153** | **0,149** | **0,147** | **0,142** | **0,155** |  |  |  |  |
| *Gallinago_stenura* | **0,186** | **0,181** | **0,172** | **0,173** | **0,163** | **0,170** | **0,163** | **0,161** | **0,162** | **0,176** | **0,172** |  |  |  |
| *Scolopax_rusticola* | **0,194** | **0,188** | **0,176** | **0,172** | **0,172** | **0,171** | **0,169** | **0,167** | **0,166** | **0,176** | **0,177** | **0,175** |  |  |
| *Vanellus_cinereus* | **0,210** | **0,205** | **0,208** | **0,197** | **0,196** | **0,203** | **0,202** | **0,194** | **0,189** | **0,205** | **0,204** | **0,214** | **0,207** |  |
| *Vanellus_vanellus* | **0,206** | **0,205** | **0,207** | **0,203** | **0,198** | **0,206** | **0,201** | **0,199** | **0,197** | **0,211** | **0,206** | **0,213** | **0,217** | **0,128** |

**Supplementaty Figures**

**Supplementary Figure 1. The reads length distribution for museum specimen of *Numenius tenuirostris***

**
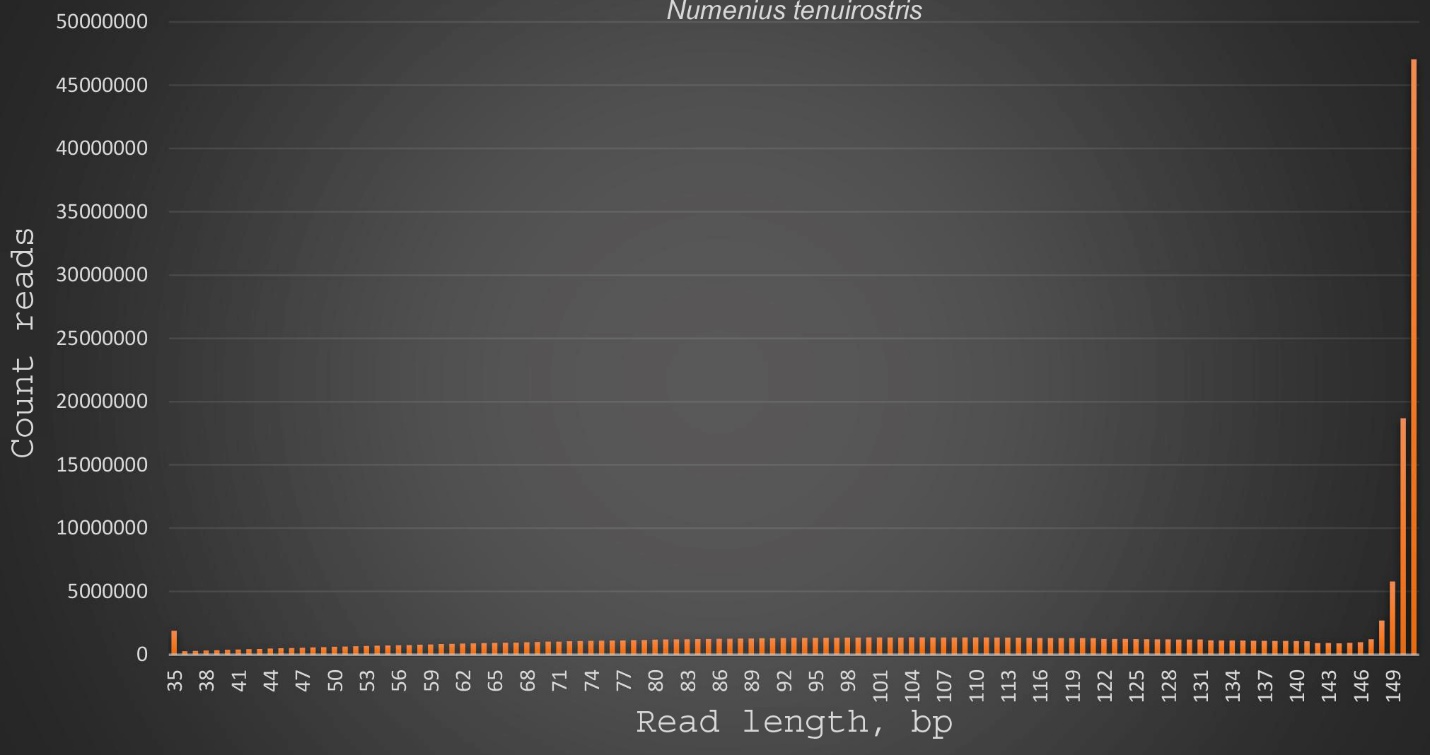
**

**Supplementary Figure 2. Neighbour-Joining phylogenetic tree reconstruction of the *Numenius* species, including the presumably extinct slender-billed curlew based on nucleotide variability of *cytB* gene**

**
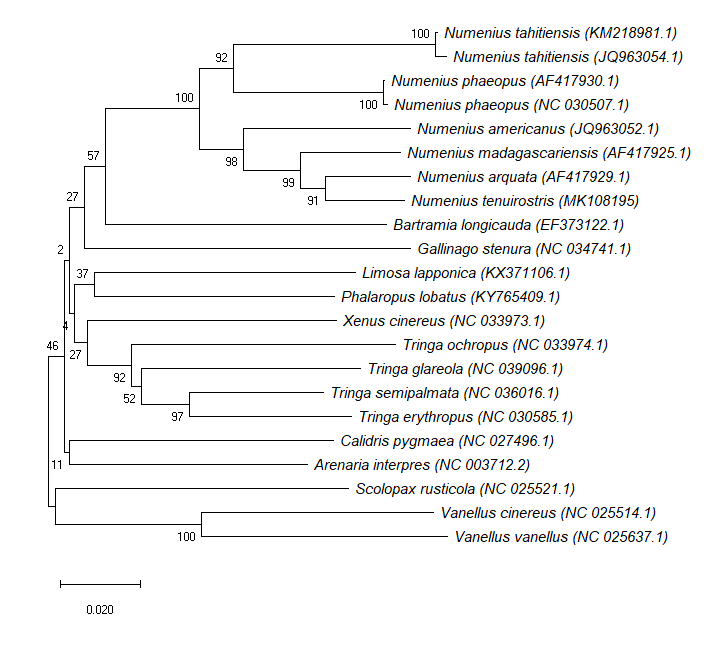
**

**Supplementary Figure 3. Maximum likelihood phylogenetic tree reconstruction of the *Numenius* species, including the presumably extinct slender-billed curlew based on nucleotide variability of *cytB* gene**

**

**

**Supplementary Figure 4. Neighbour-Joining phylogenetic tree reconstruction of the Scolopacidae species, including the presumably extinct slender-billed curlew based on their CDS**

**
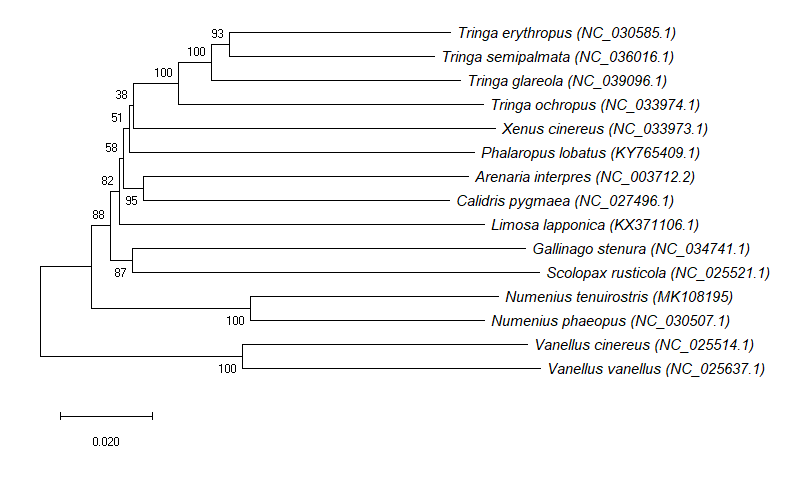
**

**Supplementary Figure 5. Maximum likelihood phylogenetic tree reconstruction of the Scolopacidae species, including the presumably extinct slender-billed curlew based on their CDSreconstruction of the Scolopacidae species, including the presumably extinct slender-billed curlew based on their CDS**

**

**
